# Supplementary material for: Trans-eQTLs Can Be Used to Untangle the Problem of Coexpression-Causality
Source: Preprints.org preprint supplement (doi:10.20944/preprints202402.1325.v1), 2024-02-23
Supplement: Supplementary file 3 [file supplementary]

## Sheet: S1 Table
			S1 Table. The nature of association between trans-QTLs, their corresponding genes and the studied traits
			SNP	A1	A2	Chr	bp	Gene	Trait	Association with Gene				Association with Trait
										B	SE	P	N	B	SE	P	N
			rs1354034	T	C	3	56849749	PNKD	Platelet count	-0.0516631	0.00812913	2.0788e-10	31470	-7.90654	0.140619	0	350474
			rs35979828	T	C	12	54685880			-0.105169	0.0146808	7.8471e-13	29622	-2.92265	0.272615	8.20648e-27	350474
			rs7968440	G	A	12	51134741			0.045361	0.00824985	3.8325e-08	31355	-1.31823	0.145287	1.16048e-19	350474
			rs12478601	C	T	2	43721508			-0.0970285	0.00812525	7.1828e-33	31086	0.660296	0.140335	2.53769e-06	350474
			rs149007767	T	C	7	50370254			-0.104203	0.0114404	8.3606e-20	29863	-0.55313	0.194185	0.00439326	350474
			rs2239630	A	G	14	23589349			-0.0496812	0.00802307	5.9255e-10	31355	-0.295166	0.139919	0.0348978	350474
			rs59072704	C	T	1	244487927			0.0625663	0.0110261	1.3934e-08	31026	-0.0827415	0.201559	0.681434	350474
			rs149110519	T	C	6	144385777			0.419659	0.0250845	7.9772e-63	25521	0.144565	0.375106	0.699942	350474
			rs149007767	T	C	7	50370254	TMBIM1		-0.0951736	0.0114023	7.0019e-17	30077	-0.55313	0.194185	0.00439326	350474
			rs149110519	T	C	6	144385777			0.137489	0.025102	4.326e-08	25735	0.144565	0.375106	0.699942	350474
			rs6684514	A	G	1	156255456			0.0599609	0.00900286	2.7383e-11	31298	0.0537713	0.150363	0.720635	350474
			rs149007767	T	C	7	50370254	CDA	Mean reticulocyte volume	-0.109065	0.0113981	1.0815e-21	30077	-0.120301	0.0261256	4.13206e-06	344728
			rs12264390	C	T	10	959111			-0.0515208	0.00928102	2.8339e-08	31569	0.0404124	0.0218696	0.0646208	344728
			rs149110519	T	C	6	144385777			0.237086	0.0250731	3.2117e-21	25735	-0.0630825	0.0504911	0.211527	344728
			rs8078723	C	T	17	38166879			-0.0447747	0.00818581	4.5054e-08	31684	0.0192967	0.0191113	0.31264	344728
			rs56330463	T	C	5	148200011			0.0571867	0.00808076	1.4752e-12	31569	-0.0163396	0.0188976	0.387238	344728
			rs8073060	A	T	17	33875262	PINK1		0.139249	0.00854685	1.1176e-59	31185	-0.122684	0.0205284	2.28521e-09	344728
			rs1354034	T	C	3	56849749			0.0522216	0.00810152	1.1499e-10	31684	-0.107621	0.0190063	1.49413e-08	344728
			rs16971217	G	C	17	33944055			0.0885715	0.0106731	1.0535e-16	31185	-0.129774	0.0245707	1.2809e-07	344728
			rs10512472	C	T	17	33884804	APOBR	Platelet count	-0.0770565	0.0116804	4.19e-11	25690	3.72282	0.182808	3.89581e-92	350474
			rs12485444	T	A	3	188135783	IL27		-0.0484255	0.00874469	3.0629e-08	26165	0.0500414	0.142801	0.726017	350474
